# Supplementary material
Source: MDPI journal article supplement (https://www.mdpi.com/2072-4292/13/22/4538)
Supplement: s1 [file s1]

## Supporting Information

### Specific Drivers and Responses to Land Surface Phenology of Different Vegetation Types in the Qinling Mountains, Central China

Jiaqi Guo <sup>1</sup>, Xiaohong Liu <sup>1,\*</sup>, Wensen Ge <sup>1</sup>, Xiaofeng Ni <sup>2</sup>, Wenyuan Ma <sup>3</sup>, Qiangqiang Lu <sup>1</sup>, Xiaoyu Xing <sup>4</sup>

<sup>1</sup> School of Geography and Tourism, Shaanxi Normal University, Xi'an 710119, China;

<sup>2</sup> Institute of Ecology, College of Urban and Environmental Sciences, and Key Laboratory for Earth Surface Processes of the Ministry of Education, Peking University, Beijing 100871, China

<sup>3</sup> School of Science, University of New South Wales, Canberra, ACT2600, Australia;

<sup>4</sup> Qinling National Botanical Garden, Xi'an 710061, China

\* **Author for Correspondence:** Xiaohong Liu

**E-mail:** xhliu@snnu.edu.cn, **Tel.:** +86 13893378787

**Figure S1.** The primary factor (SOS or EOS) controlling change in LOS across the entire study area calculated by the C-index. Blue areas denote that SOS is the primary controller of the LOS change and green areas denote that EOS is the primary controller.

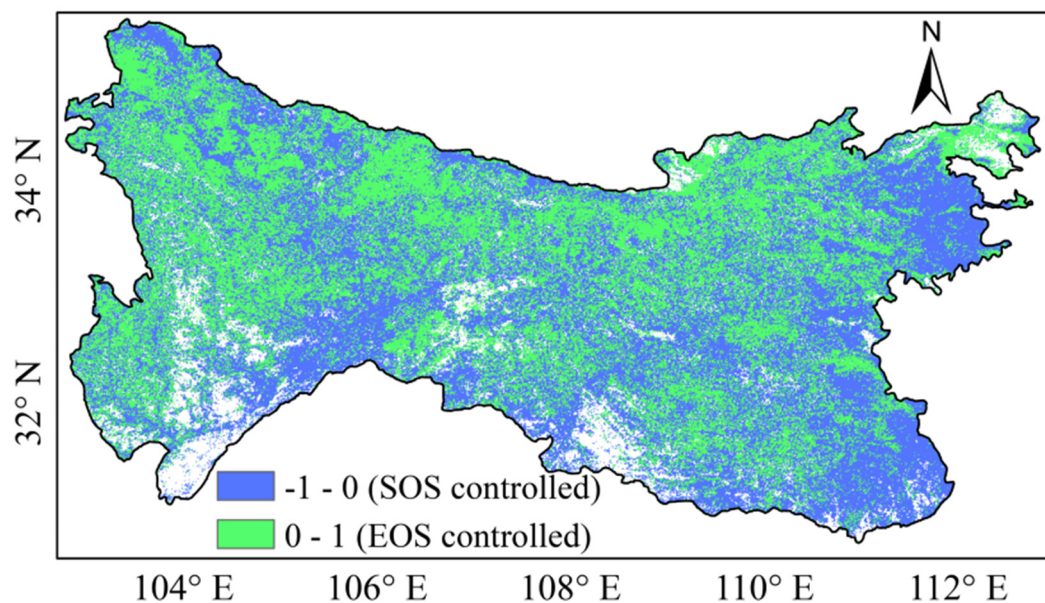

**Figure S2.** Red fitting curves between predicted LSP dates from RF model and observed LSP dates from MODIS13A2-NDVI. (a) SOS. (b) EOS. Note: “All” refers to all vegetation in the QMs.

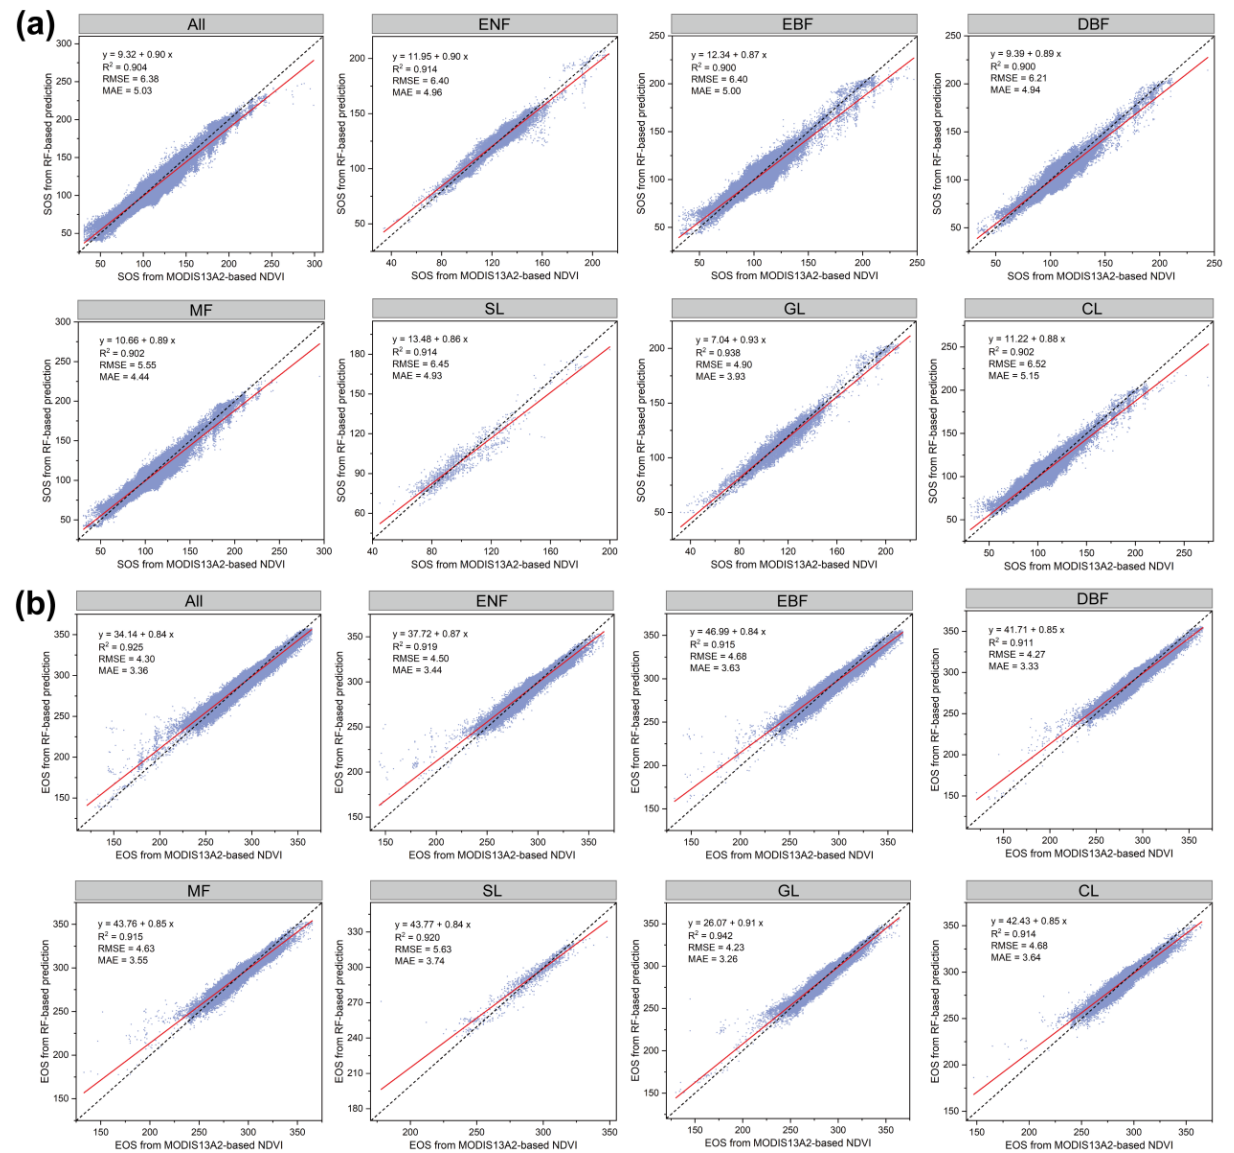

**Table S1.** The relative importance of each driver affecting interannual variation in LSP. The importance score of each variable (VI) is shown as a percentage.

| LSP<br>metrics | All<br>the Vegetation<br>Types | Meteorological factors |        |        |       |        |       | Soil factors |       |       |       | Biological factors |        |
|----------------|--------------------------------|------------------------|--------|--------|-------|--------|-------|--------------|-------|-------|-------|--------------------|--------|
|                |                                | TP                     | TG     | PP     | PG    | SWP    | SWG   | STP          | STG   | SMP   | SMG   | MN                 | MD     |
| SOS            | ENF                            | 9.94%                  | 7.86%  | 8.64%  | 4.01% | 21.28% | 2.62% | 16.69%       | 5.42% | 1.14% | 1.56% | 1.12%              | 19.71% |
|                | EBF                            | 6.36%                  | 10.35% | 11.06% | 5.92% | 17.43% | 2.14% | 9.59%        | 6.80% | 1.59% | 1.29% | 1.12%              | 26.35% |
|                | DBF                            | 7.58%                  | 8.06%  | 10.72% | 5.68% | 19.52% | 2.44% | 12.17%       | 4.32% | 1.39% | 1.49% | 1.03%              | 25.60% |
|                | MF                             | 7.49%                  | 9.98%  | 9.71%  | 5.29% | 22.05% | 2.20% | 11.64%       | 6.83% | 1.12% | 1.11% | 1.03%              | 21.55% |
|                | SL                             | 19.96%                 | 6.65%  | 3.25%  | 1.25% | 19.27% | 1.34% | 29.22%       | 5.84% | 0.59% | 0.63% | 0.65%              | 11.35% |
|                | GL                             | 10.61%                 | 9.45%  | 7.11%  | 2.74% | 28.56% | 2.79% | 13.52%       | 6.49% | 0.91% | 1.20% | 0.90%              | 15.71% |
|                | CL                             | 7.62%                  | 13.15% | 9.22%  | 4.63% | 22.51% | 1.88% | 11.03%       | 8.15% | 1.09% | 1.10% | 0.91%              | 18.70% |
|                | the whole area                 | 8.62%                  | 9.29%  | 9.18%  | 5.05% | 21.81% | 2.62% | 12.08%       | 7.08% | 1.30% | 1.40% | 1.08%              | 20.51% |
| EOS            | ENF                            | 15.31%                 | 5.46%  | 11.80% | 4.35% | 27.63% | 8.47% | 7.60%        | 4.69% | 1.40% | 1.32% | 0.85%              | 11.12% |
|                | EBF                            | 10.39%                 | 5.54%  | 12.45% | 5.33% | 27.60% | 7.38% | 7.51%        | 5.52% | 1.61% | 1.32% | 0.85%              | 14.51% |
|                | DBF                            | 11.25%                 | 5.34%  | 12.20% | 5.53% | 30.12% | 9.33% | 6.85%        | 4.74% | 1.88% | 1.68% | 1.03%              | 10.06% |

|                |        |       |        |       |        |        |        |       |       |       |       |        |
|----------------|--------|-------|--------|-------|--------|--------|--------|-------|-------|-------|-------|--------|
| MF             | 9.97%  | 5.64% | 12.03% | 4.51% | 30.80% | 10.14% | 7.56%  | 4.74% | 1.22% | 1.21% | 0.91% | 11.29% |
| SL             | 7.81%  | 5.73% | 16.94% | 9.49% | 20.51% | 3.50%  | 14.97% | 2.51% | 0.79% | 1.02% | 0.69% | 16.04% |
| GL             | 11.22% | 3.60% | 10.02% | 4.41% | 36.48% | 11.53% | 7.45%  | 4.17% | 1.15% | 1.40% | 1.13% | 7.43%  |
| CL             | 12.77% | 6.50% | 11.46% | 3.93% | 30.85% | 9.99%  | 7.23%  | 4.77% | 1.24% | 1.33% | 0.85% | 9.08%  |
| the whole area | 10.20% | 4.88% | 12.12% | 5.13% | 31.03% | 9.92%  | 7.24%  | 4.55% | 1.58% | 1.54% | 0.94% | 10.86% |

**Table S2.** Correlation results of random forest models built for different vegetation type cover areas.

| LSP<br>metrics | Different<br>vegetation areas | Model                                           | R <sup>2</sup> (training) | OOB prediction<br>error | Number of<br>Predictors |
|----------------|-------------------------------|-------------------------------------------------|---------------------------|-------------------------|-------------------------|
| SOS            | ENF                           | SOS ~ TP+TG+PP+PG+SWP+SWG+STP+STG+SMP+SMG+MN+MD | 0.949                     | 17.41                   | 438585                  |
|                | EBF                           | SOS ~ TP+TG+PP+PG+SWP+SWG+STP+STG+SMP+SMG+MN+MD | 0.948                     | 17.23                   | 806610                  |
|                | DBF                           | SOS ~ TP+TG+PP+PG+SWP+SWG+STP+STG+SMP+SMG+MN+MD | 0.958                     | 13.85                   | 1061730                 |
|                | MF                            | SOS ~ TP+TG+PP+PG+SWP+SWG+STP+STG+SMP+SMG+MN+MD | 0.944                     | 20.52                   | 365025                  |
|                | SL                            | SOS ~ TP+TG+PP+PG+SWP+SWG+STP+STG+SMP+SMG+MN+MD | 0.931                     | 32.28                   | 5490                    |
|                | GL                            | SOS ~ TP+TG+PP+PG+SWP+SWG+STP+STG+SMP+SMG+MN+MD | 0.971                     | 13.19                   | 351600                  |
|                | CL                            | SOS ~ TP+TG+PP+PG+SWP+SWG+STP+STG+SMP+SMG+MN+MD | 0.946                     | 20.46                   | 254445                  |

|     |                |                                                 |       |       |         |
|-----|----------------|-------------------------------------------------|-------|-------|---------|
| EOS | the whole area | SOS ~ TP+TG+PP+PG+SWP+SWG+STP+STG+SMP+SMG+MN+MD | 0.969 | 11.17 | 3283485 |
|     | ENF            | EOS ~ TP+TG+PP+PG+SWP+SWG+STP+STG+SMP+SMG+MN+MD | 0.961 | 10.33 | 438585  |
|     | EBF            | EOS ~ TP+TG+PP+PG+SWP+SWG+STP+STG+SMP+SMG+MN+MD | 0.959 | 9.59  | 806610  |
|     | DBF            | EOS ~ TP+TG+PP+PG+SWP+SWG+STP+STG+SMP+SMG+MN+MD | 0.963 | 7.88  | 1061730 |
|     | MF             | EOS ~ TP+TG+PP+PG+SWP+SWG+STP+STG+SMP+SMG+MN+MD | 0.948 | 12.84 | 365025  |
|     | SL             | EOS ~ TP+TG+PP+PG+SWP+SWG+STP+STG+SMP+SMG+MN+MD | 0.924 | 27.78 | 5490    |
|     | GL             | EOS ~ TP+TG+PP+PG+SWP+SWG+STP+STG+SMP+SMG+MN+MD | 0.974 | 8.35  | 351600  |
|     | CL             | EOS ~ TP+TG+PP+PG+SWP+SWG+STP+STG+SMP+SMG+MN+MD | 0.948 | 13.09 | 254445  |
|     | the whole area | EOS ~ TP+TG+PP+PG+SWP+SWG+STP+STG+SMP+SMG+MN+MD | 0.975 | 5.97  | 3283485 |
